# Supplementary material for: Electroless plating of a Sn–Ni/graphite sheet composite with improved cyclability as an anode material for lithium ion batteries
Source: Royal Society of Chemistry journal article supplement (doi:10.1039/c8ra01940a), 2018-01-01
Supplement: c8ra01940a1.pdf [file c8ra01940a1.pdf]

# Electroless plating of Sn-Ni/graphite sheets composite with improved cyclability as anode material for lithium ion batteries

Guanhua Yang<sup>a</sup>, Zhixiong Yan<sup>a</sup>, Lisan Cui<sup>a</sup>, Yonghao Qu<sup>a</sup>, Qingyu Li<sup>\*,b</sup>, Xin Li<sup>a</sup>,  
Yiyan Wang<sup>a</sup>, Hongqiang Wang<sup>\*,a,c</sup>

<sup>a</sup> School of Chemical and pharmaceutical Sciences, Guangxi Normal University, Guilin 541004, China

<sup>b</sup> Guangxi Key Laboratory of Low Carbon Energy Materials, Guangxi Normal University, Guilin 541004, China

<sup>c</sup> Hubei Key Laboratory for Processing and Application of Catalytic Materials, Huanggang Normal University, Huanggang 438000, China

**Table. S1 Chemical compositions of activation bath**

| Solution          | Concentration          |
|-------------------|------------------------|
| PdCl <sub>2</sub> | 0.2 g L <sup>-1</sup>  |
| HCl               | 2.5 ml L <sup>-1</sup> |

**Table. S2 Chemical compositions of electroless nickel plating bath**

| Solution                                                       | Concentration        |
|----------------------------------------------------------------|----------------------|
| NiSO <sub>4</sub> ·6H <sub>2</sub> O                           | 8 g L <sup>-1</sup>  |
| NaH <sub>2</sub> PO <sub>2</sub> ·H <sub>2</sub> O             | 15 g L <sup>-1</sup> |
| C <sub>6</sub> H <sub>8</sub> O <sub>7</sub> ·H <sub>2</sub> O | 15 g L <sup>-1</sup> |
| CH <sub>3</sub> COONa                                          | 20 g L <sup>-1</sup> |
| CH <sub>3</sub> COONH <sub>4</sub>                             | 20 g L <sup>-1</sup> |
| OP                                                             | 0.1g                 |

**Table. S3 Chemical compositions of electroless tin plating bath**

| Solution                                           | Concentration         |
|----------------------------------------------------|-----------------------|
| SnCl <sub>2</sub> ·H <sub>2</sub> O                | 12 g L <sup>-1</sup>  |
| H <sub>2</sub> NCSNH <sub>2</sub>                  | 100 g L <sup>-1</sup> |
| HCl                                                | 20 ml L <sup>-1</sup> |
| NaH <sub>2</sub> PO <sub>2</sub> ·H <sub>2</sub> O | 10 g L <sup>-1</sup>  |

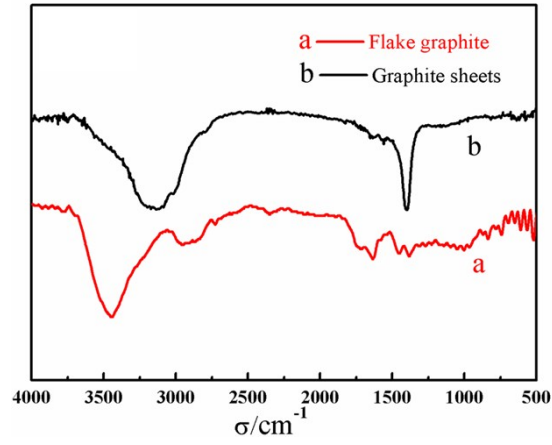

Fig. S1 The FT-IR spectra of flake graphite and oxidized graphite sheets.

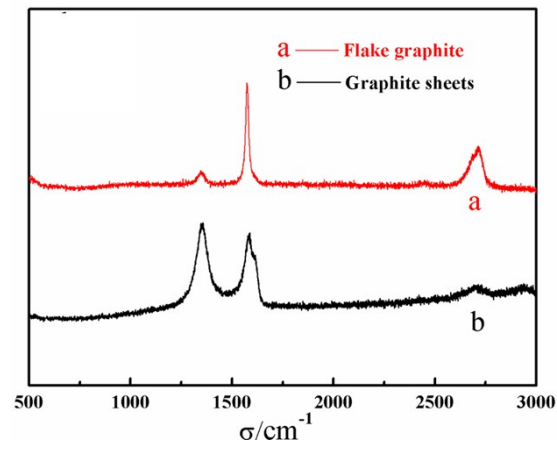

Fig. S2 The Raman spectra of flake graphite and oxidized graphite sheets.

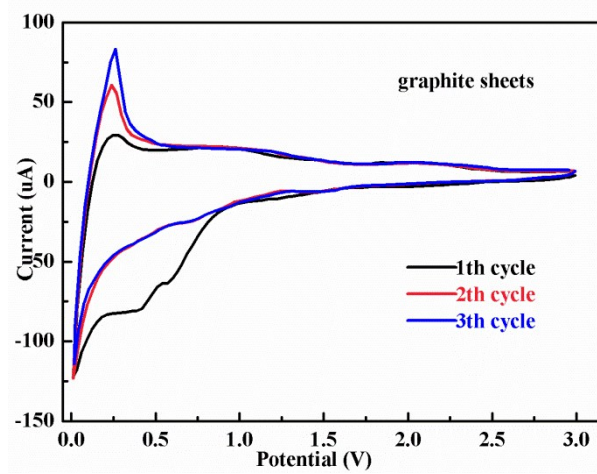

Fig. S3 The first three CV curves of the graphite sheets

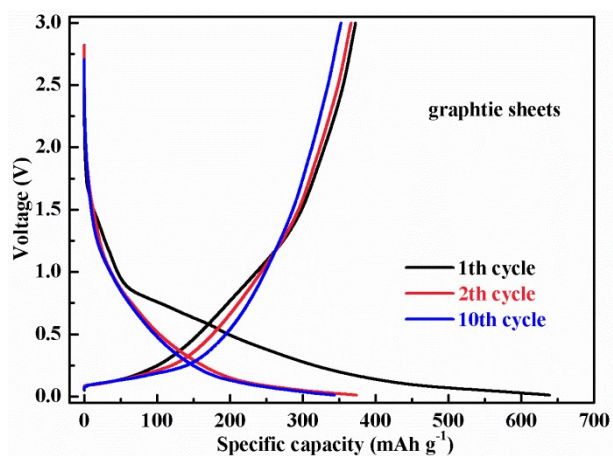

Fig. S4 The discharge-charge curves of graphite sheets at the current density of  $0.1 \text{ A g}^{-1}$

**Table. S4** The capacities of the graphite sheets, Sn/graphite sheets, Ni/graphite sheets and Sn-Ni/graphite sheets electrodes at the end of each rate (The unit of Specific capacity:  $\text{mAh g}^{-1}$ , Current density:  $\text{A g}^{-1}$ )

| Sample                | 0.1   | 0.2   | 0.5   | 1     | 2     | 5     | 10    | 0.2   | continuous 100 cycles at 0.1 |
|-----------------------|-------|-------|-------|-------|-------|-------|-------|-------|------------------------------|
| graphite sheets       | 356.6 | 318.7 | 248.1 | 196.5 | 146.2 | 85.9  | 50.0  | 408.4 | 487.9                        |
| Ni/graphite sheets    | 433.1 | 403.2 | 351.1 | 290.1 | 197.5 | 99.8  | 55.8  | 413.3 | 506.6                        |
| Sn/graphite sheets    | 466.9 | 439.2 | 384.5 | 316.7 | 231.1 | 130.6 | 100.9 | 461.4 | 530.4                        |
| Sn-Ni/graphite sheets | 637.4 | 586.3 | 466.7 | 371.5 | 273.6 | 165.3 | 97.3  | 712.3 | 802.4                        |
